# Supplementary material for: Influence of the stabilizing ligand on the quality, signal-relevant optical properties, and stability of near-infrared emitting Cd1−xHgxTe nanocrystals
Source: Royal Society of Chemistry journal article supplement (doi:10.1039/c4tc00582a), 2014-01-01
Supplement: c4tc00582a1.pdf [file c4tc00582a1.pdf]

## Supporting Information

### Influence of the stabilizing ligand on the quality, signal-relevant optical properties, and stability of near-infrared emitting Cd<sub>1-x</sub>Hg<sub>x</sub>Te nanocrystals.

by S. Leubner<sup>a</sup>, R. Schneider<sup>b</sup>, A. Dubavik<sup>a</sup>, S. Hatami<sup>b</sup>, N. Gaponik<sup>a\*</sup>, U. Resch-Genger<sup>b\*</sup> and A. Eychmüller<sup>a</sup>

<sup>a</sup> Physical Chemistry and Center for Advancing Electronics Dresden, TU Dresden, Bergstr. 66b, 01062 Dresden, Germany

<sup>b</sup> BAM Federal Institute for Materials Research and Testing, Richard-Willstätter-Str. 11, 12489 Berlin, Germany

\* Corresponding Author: nikolai.gaponik@chemie.tu-dresden.de; ute.resch@bam.de

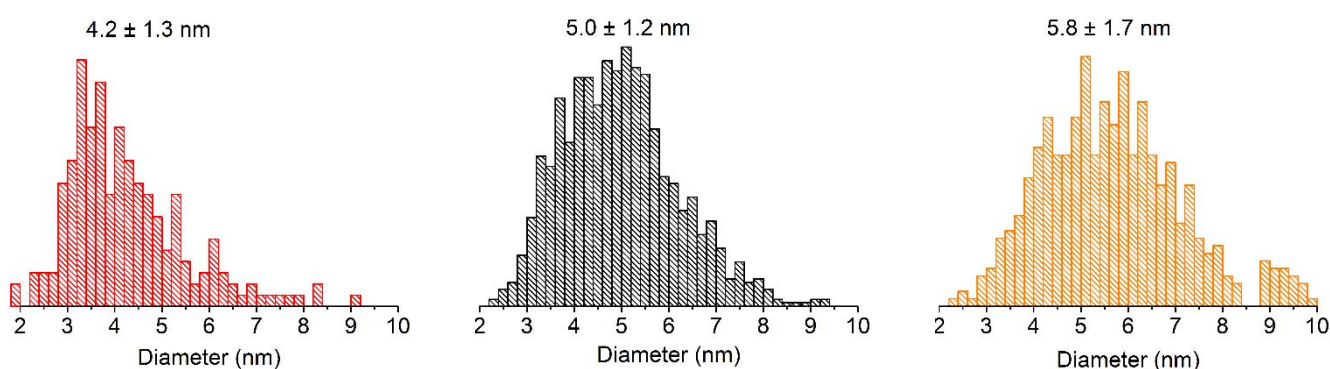

Figure S1 TEM histograms of TGA (T, left, red)-, MPA(M, middle, black)-, and GSH(G, right, orange)-capped CdHgTe NCs calculated from several images and more than 100 particles.
